# Supplementary figures and images for: Modulation of the chelatable Zn pool in the brain by diethyldithiocarbamate is associated with behavioral impairment in adult zebrafish
Source: Royal Society of Chemistry journal article supplement (doi:10.1039/c4tx00111g), 2014-11-19

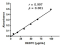

Supplement: c4tx00111g2.pdf [file c4tx00111g2.pdf]
